# Supplementary material
Source: publisher figshare collection journal article supplement (https://frontiersin.figshare.com/ndownloader/files/30602892)
Supplement: Supplementary file [file 30602892]

**Supplementary Table 2. Content of total phenolic compounds, flavonoids, antioxidant activity by the DPPH method (IC<sub>50</sub>), and determination of radical scavenging activity by the ABTS method (%) of the extracts of different samples from Brazilian propolis.** The extracts were obtained by the conventional ethanolic (EtOH) and supercritical (SCO<sub>2</sub>) extraction methods. RAL – red propolis from Alagoas State; GRP – green propolis from Paraná State; BSC – brown propolis from Santa Catarina State. These parameters were defined by Machado et al (14).

| <b>Propolis extracts</b>   | <b>Phenolic compounds (mg EAG/g)</b> | <b>Flavonoids (mg EQ/g)</b> | <b>DPPH (IC<sub>50</sub>)</b> | <b>ABTS (%) (Trolox 1 mg/mL)</b> |
|----------------------------|--------------------------------------|-----------------------------|-------------------------------|----------------------------------|
| <b>RAL SCO<sub>2</sub></b> | 157.16 ± 0.01                        | 40.65 ± 0.01                | 183.11 ± 0.31                 | 82.80 ± 3.50                     |
| <b>RAL EtOH</b>            | 198.77 ± 0.01                        | 58.19 ± 0.01                | 44.29 ± 0.29                  | 98.20 ± 1.30                     |
| <b>GRP SCO<sub>2</sub></b> | 118.14 ± 0.03                        | 29.71 ± 0.01                | 85.34 ± 0.23                  | 73.80 ± 1.80                     |
| <b>GPR EtOH</b>            | 179.52 ± 0.01                        | 39.90 ± 0.01                | 157.39 ± 0.26                 | 89.90 ± 1.80                     |
| <b>BSC SCO<sub>2</sub></b> | 218.09 ± 0.01                        | 31.38 ± 0.01                | 331.88 ± 0.09                 | 72.70 ± 5.30                     |
| <b>BSC EtOH</b>            | 117.03 ± 0.01                        | 27.97 ± 0.01                | 163.00 ± 0.31                 | 89.80 ± 1.20                     |
